# Supplementary material for: Gut Microbiota in Patients with Prediabetes
Source: MDPI journal article supplement (doi:10.3390/nu16081105), 2024-04-09
Supplement: s1 [file s1]

## Supplementary Tables

**Table S1 Nutrition intake of patients with prediabetes in 24 hours**

|               | Gender | Calories (Kcal) | Carbohydrate (g) | Crude Protein (g) | Crude Fat (g) | Dietary Fiber (g) |
|---------------|--------|-----------------|------------------|-------------------|---------------|-------------------|
| Prediabetes1  | Female | 1066.43         | 220.28           | 36.69             | 7.73          | 18.86             |
| Prediabetes2  | Female | 1430.55         | 285.22           | 30.66             | 24.96         | 13.05             |
| Prediabetes3  | Female | 1056.17         | 183.87           | 48.19             | 20.31         | 19.91             |
| Prediabetes4  | Female | 1754.17         | 249.65           | 86.99             | 49.79         | 21.64             |
| Prediabetes5  | Male   | 502.16          | 99.01            | 16.2              | 5.12          | 2.96              |
| Prediabetes6  | Male   | 1298.7          | 211.87           | 52.77             | 27.42         | 14.52             |
| Prediabetes7  | Female | 1492.21         | 323.08           | 51.86             | 18.07         | 3.7               |
| Prediabetes8  | Male   | 2431.66         | 305.57           | 108.38            | 93.03         | 22.1              |
| Prediabetes9  | Male   | 1345.88         | 255.69           | 53.99             | 15.41         | 16.57             |
| Prediabetes10 | Male   | 1060.73         | 111.9            | 63.06             | 43.84         | 13.67             |
| Prediabetes11 | Female | 821.83          | 145.11           | 38.21             | 13.29         | 16.96             |
| Prediabetes12 | Female | 695.02          | 110.46           | 40.03             | 13.86         | 13.96             |
| Prediabetes13 | Male   | 3079.56         | 569.48           | 76.16             | 56.47         | 10.59             |
| Prediabetes14 | Male   | 1207.68         | 190.07           | 52.67             | 26.59         | 9.97              |
| Prediabetes15 | Female | 2160.4          | 220.98           | 81.03             | 106.91        | 10.9              |
| Prediabetes16 | Female | 1633.4          | 268.86           | 49.57             | 55.82         | 16.62             |
| Prediabetes17 | Male   | 2938.38         | 359.93           | 126.63            | 118.18        | 30.33             |
| Prediabetes18 | Male   | 1983.43         | 287.4            | 54.97             | 75.17         | 24.99             |
| Prediabetes19 | Female | 986.43          | 122.71           | 50.16             | 35.51         | 9.21              |
| Prediabetes20 | Female | 1487.54         | 216.06           | 34.56             | 56.32         | 11.89             |
| Prediabetes21 | Male   | 1943.03         | 301.77           | 93.46             | 50.78         | 37.03             |
| Prediabetes22 | Female | 3027.58         | 318.41           | 132.06            | 144.06        | 37.72             |
| Prediabetes23 | Male   | 1836.21         | 289.35           | 75.67             | 47.44         | 31.49             |
| Prediabetes24 | Male   | 2253.34         | 298.12           | 103.57            | 77.61         | 25.78             |
| Prediabetes25 | Male   | 1450.5          | 98.79            | 60.49             | 93.75         | 12.41             |
| Prediabetes26 | Female | 1321.55         | 212.02           | 45.93             | 35.87         | 3.93              |
| Prediabetes27 | Male   | 2505.27         | 220.4            | 141.45            | 123.61        | 11.22             |
| Prediabetes28 | Male   | 1863.08         | 279.59           | 66.31             | 57.19         | 9.52              |
| Prediabetes29 | Female | 1216.56         | 168              | 43                | 43.11         | 11.22             |
| Prediabetes30 | Male   | 1103.5          | 149.6            | 34.55             | 49.13         | 25.35             |
| Prediabetes31 | Female | 1863.08         | 279.59           | 66.31             | 57.19         | 9.52              |
| Prediabetes32 | Male   | 2112.51         | 311.15           | 63.19             | 72.01         | 14.02             |
| Prediabetes33 | Female | 2450.63         | 431.57           | 85.08             | 45.12         | 17.97             |
| Prediabetes34 | Male   | 1509.19         | 178.41           | 79.45             | 54.1          | 8.01              |
| Prediabetes35 | Female | 2007.31         | 324.1            | 64.72             | 64.11         | 55.39             |
| Prediabetes36 | Female | 617.31          | 73.87            | 47.04             | 17.12         | 9.45              |
| Prediabetes37 | Female | 1193.08         | 131.66           | 45.62             | 57.93         | 10.64             |
| Prediabetes38 | Female | 1659.84         | 322.35           | 46.45             | 23.29         | 20.95             |
| Prediabetes39 | Female | 1931.9          | 229.96           | 57.49             | 87.33         | 7.48              |
| Prediabetes40 | Female | 839.83          | 110.26           | 32.74             | 33.16         | 15.04             |
| Prediabetes41 | Female | 1599.8          | 150.82           | 71.34             | 81.12         | 17.94             |
| Prediabetes42 | Female | 395.25          | 41.58            | 16.01             | 20.37         | 6.94              |
| Prediabetes43 | Male   | 834.68          | 97.73            | 29.31             | 36.8          | 5.76              |
| Prediabetes44 | Female | 1146.34         | 137.94           | 68.7              | 37.04         | 8.78              |
| Prediabetes45 | Female | 1319.51         | 139.18           | 54.31             | 62.87         | 13.41             |
| Prediabetes46 | Male   | 1081.72         | 117.45           | 41.56             | 49.86         | 2.89              |
| Prediabetes47 | Female | 1155.53         | 133.85           | 57.65             | 45.49         | 9.4               |
| Prediabetes48 | Female | 1418.69         | 207.31           | 56.16             | 45.76         | 21.57             |
| Prediabetes49 | Male   | 1900.97         | 277.27           | 66.99             | 59.36         | 7                 |
| Prediabetes50 | Male   | 1414.77         | 128.41           | 72.96             | 71.68         | 10.34             |
| Prediabetes51 | Female | 351.13          | 72.41            | 8.63              | 3.17          | 0.66              |
| Prediabetes52 | Male   | 1491.46         | 182.4            | 66.07             | 61.54         | 25.13             |
| Prediabetes53 | Female | 1538.98         | 212.86           | 68.57             | 59.56         | 45.18             |
| Prediabetes54 | Male   | 1257.23         | 153.75           | 65.57             | 43.93         | 6.38              |
| Prediabetes55 | Male   | 1576.7          | 135.4            | 79.16             | 74.18         | 7.71              |
| Prediabetes56 | Male   | 583.51          | 109.57           | 20.94             | 6.45          | 1.39              |
| Prediabetes57 | Female | 1050.76         | 128.66           | 68.67             | 37.66         | 29.78             |

**Table S2 Results of nucleic acid sequencing of 117 fecal samples**

| Sample name | # of Raw reads | # of QC |       | Richness* | chao1* | Shannon* | Simpson* |
|-------------|----------------|---------|-------|-----------|--------|----------|----------|
|             |                | reads   | QC%   |           |        |          |          |
| Healthy1    | 143,332        | 131,092 | 91.46 | 93        | 93     | 3.4769   | 0.9515   |
| Healthy2    | 84,458         | 74,761  | 88.52 | 83        | 83     | 2.7551   | 0.8238   |
| Healthy3    | 80,207         | 71,554  | 89.21 | 52        | 52     | 2.7953   | 0.8943   |
| Healthy4    | 103,015        | 93,582  | 90.84 | 68        | 68     | 2.4756   | 0.7966   |
| Healthy5    | 84,448         | 71,946  | 85.2  | 92        | 93     | 2.7816   | 0.8113   |
| Healthy6    | 150,757        | 126,764 | 84.08 | 114       | 114    | 3.4092   | 0.9199   |
| Healthy7    | 132,384        | 114,387 | 86.41 | 77        | 78     | 3.0616   | 0.9268   |
| Healthy8    | 99,623         | 89,034  | 89.37 | 74        | 74     | 3.2579   | 0.9347   |
| Healthy9    | 124,101        | 108,738 | 87.62 | 100       | 100    | 3.1472   | 0.9267   |
| Healthy10   | 221,690        | 207,366 | 93.54 | 97        | 97     | 3.1384   | 0.9263   |
| Healthy11   | 140,764        | 128,747 | 91.46 | 80        | 81     | 2.6471   | 0.8764   |
| Healthy12   | 261,188        | 231,642 | 88.69 | 115       | 115    | 3.5438   | 0.9470   |
| Healthy13   | 207,542        | 188,806 | 90.97 | 118       | 118    | 3.3085   | 0.9320   |
| Healthy14   | 171,377        | 153,452 | 89.54 | 104       | 104    | 3.2706   | 0.9135   |
| Healthy15   | 122,531        | 113,310 | 92.47 | 63        | 63     | 2.6955   | 0.8986   |
| Healthy16   | 166,637        | 143,173 | 85.92 | 116       | 116    | 3.4618   | 0.9360   |
| Healthy17   | 220,077        | 190,210 | 86.43 | 113       | 113.5  | 2.8792   | 0.8806   |
| Healthy18   | 135,983        | 121,999 | 89.72 | 93        | 93     | 3.2874   | 0.9351   |
| Healthy19   | 191,272        | 168,043 | 87.86 | 47        | 47     | 0.9837   | 0.3386   |
| Healthy20   | 147,699        | 113,184 | 76.63 | 67        | 67     | 2.5667   | 0.8212   |
| Healthy21   | 175,163        | 160,306 | 91.52 | 64        | 64     | 2.5274   | 0.8443   |
| Healthy22   | 135,980        | 124,844 | 91.81 | 138       | 138    | 3.6334   | 0.9514   |
| Healthy23   | 178,857        | 157,261 | 87.93 | 92        | 92     | 3.0735   | 0.9216   |
| Healthy24   | 104,922        | 97,093  | 92.54 | 110       | 110    | 3.2381   | 0.8996   |
| Healthy25   | 207,617        | 178,902 | 86.17 | 142       | 142    | 3.8616   | 0.9646   |
| Healthy26   | 144,823        | 127,015 | 87.7  | 71        | 71.5   | 2.2779   | 0.7895   |
| Healthy27   | 160,661        | 136,066 | 84.69 | 77        | 77     | 2.8937   | 0.9079   |
| Healthy28   | 156,257        | 126,929 | 81.23 | 90        | 90     | 3.1851   | 0.9336   |
| Healthy29   | 136,261        | 115,851 | 85.02 | 104       | 104    | 3.1989   | 0.9268   |
| Healthy30   | 276,427        | 244,511 | 88.45 | 68        | 68     | 2.4423   | 0.8444   |
| Healthy31   | 162,122        | 133,784 | 82.52 | 73        | 73     | 2.7247   | 0.8766   |
| Healthy32   | 165,391        | 148,198 | 89.6  | 87        | 87     | 3.3418   | 0.9454   |
| Healthy33   | 151,452        | 130,810 | 86.37 | 72        | 72     | 2.6045   | 0.8694   |
| Healthy34   | 87,773         | 81,234  | 92.55 | 96        | 96     | 2.9143   | 0.8693   |
| Healthy35   | 228,268        | 179,295 | 78.55 | 102       | 102    | 3.1097   | 0.9156   |
| Healthy36   | 192,432        | 170,330 | 88.51 | 161       | 161    | 4.1271   | 0.9746   |
| Healthy37   | 187,812        | 165,444 | 88.09 | 117       | 117    | 3.4155   | 0.9390   |
| Healthy38   | 169,964        | 136,557 | 80.34 | 55        | 55     | 2.7181   | 0.9052   |
| Healthy39   | 181,194        | 145,323 | 80.2  | 89        | 89     | 3.1041   | 0.9258   |
| Healthy40   | 154,297        | 126,016 | 81.67 | 85        | 85     | 2.9381   | 0.9049   |
| Healthy41   | 212,154        | 171,638 | 80.9  | 73        | 73     | 1.7416   | 0.6699   |
| Healthy42   | 182,113        | 147,677 | 81.09 | 94        | 94     | 3.3591   | 0.9405   |
| Healthy43   | 188,200        | 167,557 | 89.03 | 121       | 121    | 3.8036   | 0.9675   |
| Healthy44   | 150,273        | 126,789 | 84.37 | 67        | 67     | 2.5977   | 0.8582   |
| Healthy45   | 208,561        | 166,949 | 80.05 | 114       | 114    | 3.7366   | 0.9627   |
| Healthy46   | 192,242        | 170,937 | 88.92 | 91        | 91     | 3.0315   | 0.8958   |
| Healthy47   | 179,324        | 159,621 | 89.01 | 80        | 80     | 2.7781   | 0.8780   |
| Healthy48   | 172,310        | 152,148 | 88.3  | 62        | 62     | 2.3584   | 0.8404   |
| Healthy49   | 178,226        | 160,353 | 89.97 | 109       | 109    | 3.0580   | 0.9033   |
| Healthy50   | 172,741        | 152,656 | 88.37 | 84        | 84     | 3.0289   | 0.9197   |
| Healthy51   | 164,173        | 142,883 | 87.03 | 122       | 122    | 3.5321   | 0.9299   |
| Healthy52   | 202,407        | 178,778 | 88.33 | 90        | 90     | 3.3087   | 0.9400   |
| Healthy53   | 194,068        | 178,933 | 92.2  | 120       | 120    | 3.0757   | 0.9023   |
| Healthy54   | 235,597        | 198,654 | 84.32 | 125       | 125    | 3.3756   | 0.9298   |
| Healthy55   | 176,923        | 158,584 | 89.63 | 63        | 63     | 2.0556   | 0.7993   |

|               |         |         |       |     |      |        |        |
|---------------|---------|---------|-------|-----|------|--------|--------|
| Healthy56     | 159,974 | 145,183 | 90.75 | 83  | 83   | 2.9239 | 0.8912 |
| Healthy57     | 177,011 | 160,779 | 90.83 | 89  | 89   | 3.0402 | 0.9018 |
| Healthy58     | 185,740 | 153,935 | 82.88 | 75  | 75   | 2.7175 | 0.8471 |
| Healthy59     | 134,358 | 113,495 | 84.47 | 131 | 131  | 3.7223 | 0.9550 |
| Healthy60     | 88,734  | 72,202  | 81.37 | 66  | 66   | 2.7255 | 0.8455 |
| Prediabetes1  | 107,329 | 93,417  | 87.04 | 54  | 54   | 2.7442 | 0.8984 |
| Prediabetes2  | 73,078  | 55,526  | 75.98 | 65  | 65   | 3.0590 | 0.9168 |
| Prediabetes3  | 186,025 | 153,591 | 82.56 | 67  | 67.5 | 2.8864 | 0.9241 |
| Prediabetes4  | 115,824 | 98,190  | 84.78 | 77  | 77   | 3.0391 | 0.9080 |
| Prediabetes5  | 112,431 | 94,603  | 84.14 | 51  | 52   | 2.2704 | 0.8373 |
| Prediabetes6  | 126,646 | 108,781 | 85.89 | 85  | 85   | 3.5018 | 0.9470 |
| Prediabetes7  | 131,859 | 101,077 | 76.66 | 88  | 88   | 3.2388 | 0.9323 |
| Prediabetes8  | 94,953  | 79,654  | 83.89 | 73  | 73   | 3.2453 | 0.9392 |
| Prediabetes9  | 128,196 | 102,170 | 79.7  | 48  | 48   | 2.6200 | 0.9008 |
| Prediabetes10 | 98,761  | 81,968  | 83    | 76  | 76   | 3.1837 | 0.9257 |
| Prediabetes11 | 101,182 | 85,595  | 84.6  | 86  | 86   | 3.2440 | 0.9375 |
| Prediabetes12 | 152,776 | 128,493 | 84.11 | 78  | 78   | 3.3692 | 0.9482 |
| Prediabetes13 | 136,894 | 121,165 | 88.51 | 49  | 49   | 2.6135 | 0.8824 |
| Prediabetes14 | 140,782 | 118,032 | 83.84 | 52  | 52   | 2.5695 | 0.8611 |
| Prediabetes15 | 151,063 | 117,000 | 77.45 | 60  | 60   | 2.8990 | 0.9176 |
| Prediabetes16 | 142,188 | 115,165 | 80.99 | 77  | 77   | 3.3244 | 0.9428 |
| Prediabetes17 | 128,981 | 105,759 | 82    | 96  | 96   | 3.2343 | 0.9334 |
| Prediabetes18 | 182,983 | 143,002 | 78.15 | 82  | 82   | 3.3456 | 0.9417 |
| Prediabetes19 | 59,024  | 50,911  | 86.25 | 87  | 87   | 3.5944 | 0.9556 |
| Prediabetes20 | 179,229 | 155,856 | 86.96 | 66  | 66   | 3.1591 | 0.9380 |
| Prediabetes21 | 158,503 | 134,493 | 84.85 | 100 | 100  | 3.3846 | 0.9444 |
| Prediabetes22 | 205,581 | 168,926 | 82.17 | 57  | 57   | 2.6750 | 0.8935 |
| Prediabetes23 | 199,562 | 171,112 | 85.74 | 72  | 72.5 | 3.2234 | 0.9390 |
| Prediabetes24 | 164,300 | 155,756 | 94.8  | 67  | 67   | 3.0712 | 0.9239 |
| Prediabetes25 | 80,620  | 67,805  | 84.1  | 46  | 46   | 2.4393 | 0.8608 |
| Prediabetes26 | 73,235  | 61,763  | 84.34 | 46  | 46   | 2.8211 | 0.9130 |
| Prediabetes27 | 61,682  | 53,606  | 86.91 | 97  | 97.5 | 3.5192 | 0.9444 |
| Prediabetes28 | 75,700  | 66,247  | 87.51 | 51  | 51   | 2.5168 | 0.8563 |
| Prediabetes29 | 165,381 | 143,671 | 86.87 | 64  | 64   | 2.6606 | 0.8726 |
| Prediabetes30 | 98,786  | 86,665  | 87.73 | 74  | 74   | 2.9611 | 0.9007 |
| Prediabetes31 | 89,584  | 83,773  | 93.51 | 108 | 108  | 3.5441 | 0.9505 |
| Prediabetes32 | 68,706  | 59,448  | 86.53 | 78  | 78   | 3.2897 | 0.9410 |
| Prediabetes33 | 110,080 | 99,163  | 90.08 | 94  | 100  | 3.0739 | 0.9161 |
| Prediabetes34 | 178,295 | 162,356 | 91.06 | 105 | 106  | 3.4221 | 0.9528 |
| Prediabetes35 | 59,984  | 56,768  | 94.64 | 42  | 42   | 2.9121 | 0.9280 |
| Prediabetes36 | 65,608  | 62,234  | 94.86 | 67  | 68   | 3.0023 | 0.9297 |
| Prediabetes37 | 58,956  | 45,310  | 76.85 | 71  | 71   | 3.2337 | 0.9391 |
| Prediabetes38 | 144,154 | 136,449 | 94.66 | 56  | 56   | 3.0827 | 0.9182 |
| Prediabetes39 | 70,506  | 57,840  | 82.04 | 79  | 79   | 3.4785 | 0.9523 |
| Prediabetes40 | 193,799 | 180,989 | 93.39 | 70  | 71   | 3.1657 | 0.9348 |
| Prediabetes41 | 169,371 | 158,303 | 93.47 | 81  | 81   | 3.6166 | 0.9600 |
| Prediabetes42 | 92,172  | 85,225  | 92.46 | 44  | 44   | 3.0682 | 0.9369 |
| Prediabetes43 | 197,153 | 182,597 | 92.62 | 93  | 93   | 3.7065 | 0.9602 |
| Prediabetes44 | 175,178 | 161,233 | 92.04 | 81  | 81   | 3.4098 | 0.9437 |
| Prediabetes45 | 142,621 | 132,068 | 92.6  | 58  | 58   | 3.2252 | 0.9414 |
| Prediabetes46 | 197,680 | 180,795 | 91.46 | 69  | 69   | 3.2433 | 0.9431 |
| Prediabetes47 | 135,452 | 123,944 | 91.5  | 56  | 56   | 3.0924 | 0.9364 |
| Prediabetes48 | 181,896 | 169,569 | 93.22 | 86  | 86   | 3.5038 | 0.9525 |
| Prediabetes49 | 216,982 | 200,081 | 92.21 | 88  | 88   | 3.6257 | 0.9612 |
| Prediabetes50 | 190,994 | 180,194 | 94.35 | 72  | 72   | 3.4783 | 0.9551 |
| Prediabetes51 | 176,678 | 166,147 | 94.04 | 57  | 57   | 3.2079 | 0.9413 |
| Prediabetes52 | 165,244 | 155,327 | 94    | 111 | 111  | 3.9659 | 0.9689 |
| Prediabetes53 | 125,208 | 117,403 | 93.77 | 38  | 38   | 2.5171 | 0.8840 |
| Prediabetes54 | 128,129 | 120,317 | 93.9  | 63  | 63   | 3.2749 | 0.9465 |
| Prediabetes55 | 132,784 | 123,722 | 93.18 | 80  | 80   | 3.6480 | 0.9616 |

|               |         |         |       |    |    |        |        |
|---------------|---------|---------|-------|----|----|--------|--------|
| Prediabetes56 | 173,197 | 161,758 | 93.4  | 69 | 69 | 2.9680 | 0.9042 |
| Prediabetes57 | 140,568 | 131,250 | 93.37 | 74 | 74 | 3.6978 | 0.9657 |

**\*Alpha diversity of microbial communities**
